# Supplementary material for: Acoustic enrichment of sperm for in vitro fertilization
Source: Royal Society of Chemistry journal article supplement (doi:10.1039/d4lc00604f), 2024-01-01
Supplement: d4lc00604f5.pdf [file d4lc00604f5.pdf]

# Electronic Supplementary Information

## Acoustic enrichment of sperm for in vitro fertilization

Chunqiu Zhang,<sup>a,c,†</sup> Ning Rong,<sup>a,†</sup> Ziyi Lin,<sup>b,c,†</sup> Peng-Qi Li,<sup>a</sup> Jingyao Shi,<sup>a</sup> Wei Zhou,<sup>a</sup>  
Lili Niu,<sup>a</sup> Fei Li,<sup>a</sup> Rongxin Tang,<sup>\*e</sup> Lei Li<sup>\*b</sup> and Long Meng<sup>\*a,d</sup>

<sup>a</sup>Key Laboratory of Biomedical Imaging Science and System, Shenzhen Institutes of Advanced Technology, Chinese Academy of Sciences, Shenzhen, Guangdong 518055, P. R. China.

<sup>b</sup>The Brain Cognition and Brain Disease Institute, Shenzhen Institute of Advanced Technology, Chinese Academy of Sciences, Shenzhen, P. R. China.

<sup>c</sup>University of Chinese Academy of Sciences, Beijing 100190, P. R. China.

<sup>d</sup>College of Medicine and Biological Information Engineering, Northeastern University, Shenyang, Liaoning 110016, P. R. China

<sup>e</sup>Center for Reproductive Medicine, Shanghai 10th People's Hospital of Tongji University, Shanghai 200072, P. R. China.

<sup>†</sup>These authors contributed equally to this work.

E-mail: [long.meng@siat.ac.cn](mailto:long.meng@siat.ac.cn); Tel: +86 755 86392484

## Supplementary Figures.

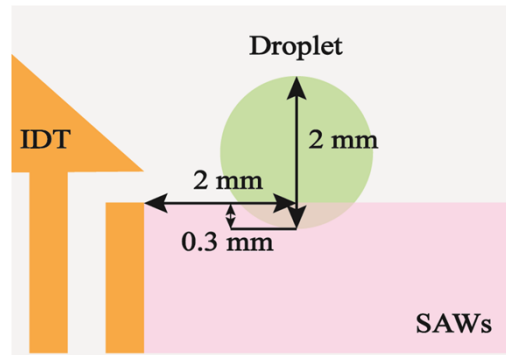

**Fig. S1** The relative position of the liquid droplet in the device.

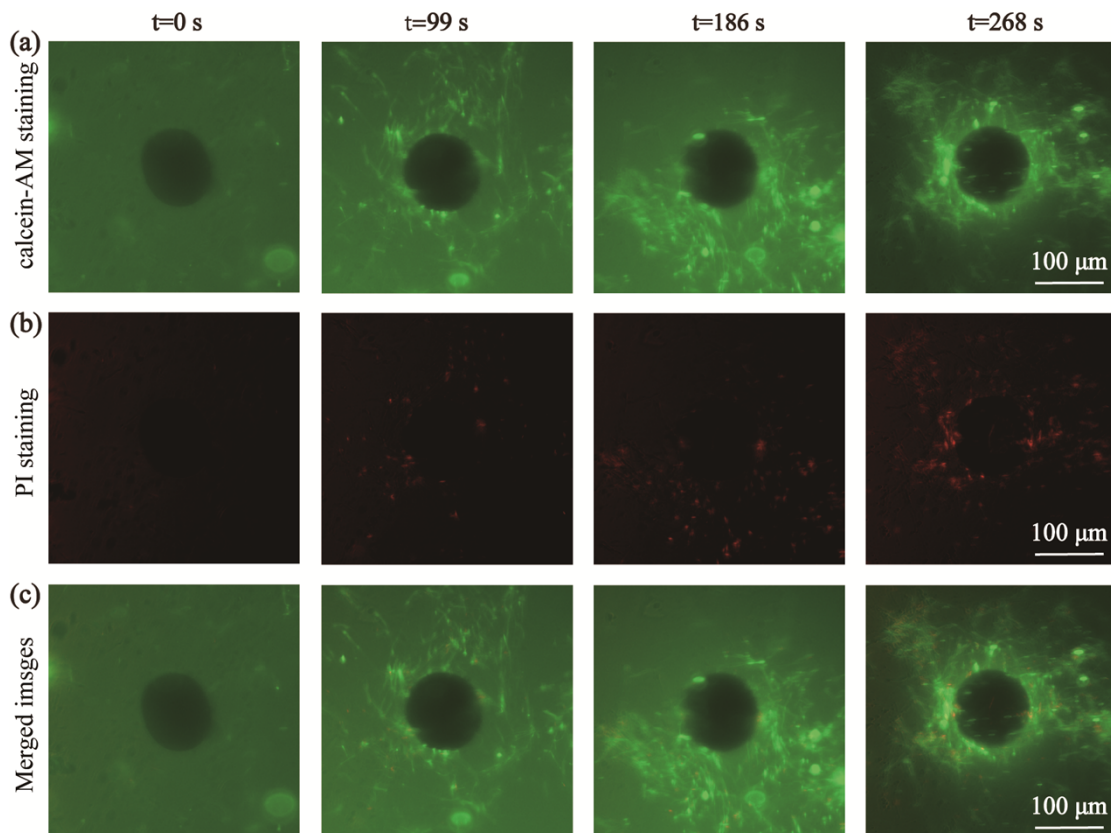

**Fig. S2** Enrichment process of live and dead sperm around PS particles with a diameter of  $100 \mu\text{m}$  during acoustic treatment. (a) Fluorescently stained sperm with calcein-AM, which indicated their viability. (b) Fluorescently stained sperm with PI, which indicates their death. (c) The merged images of fluorescently stained sperm with calcein-AM and PI.

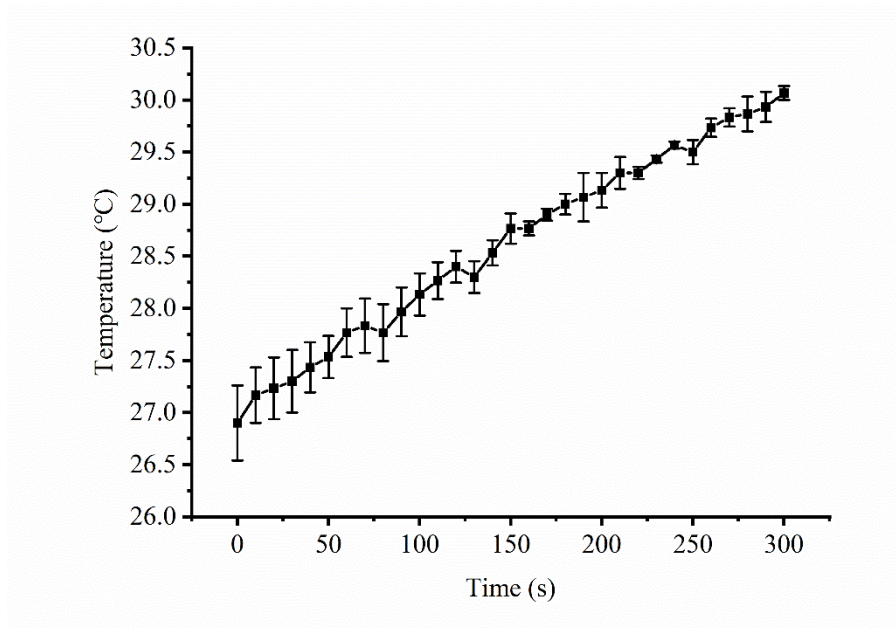

**Fig. S3** The temperature distribution of a 1  $\mu\text{L}$  droplet on the substrate over time.
