# Supplementary figures and images for: Acoustic enrichment of sperm for in vitro fertilization
Source: Royal Society of Chemistry journal article supplement (doi:10.1039/d4lc00604f), 2024-01-01

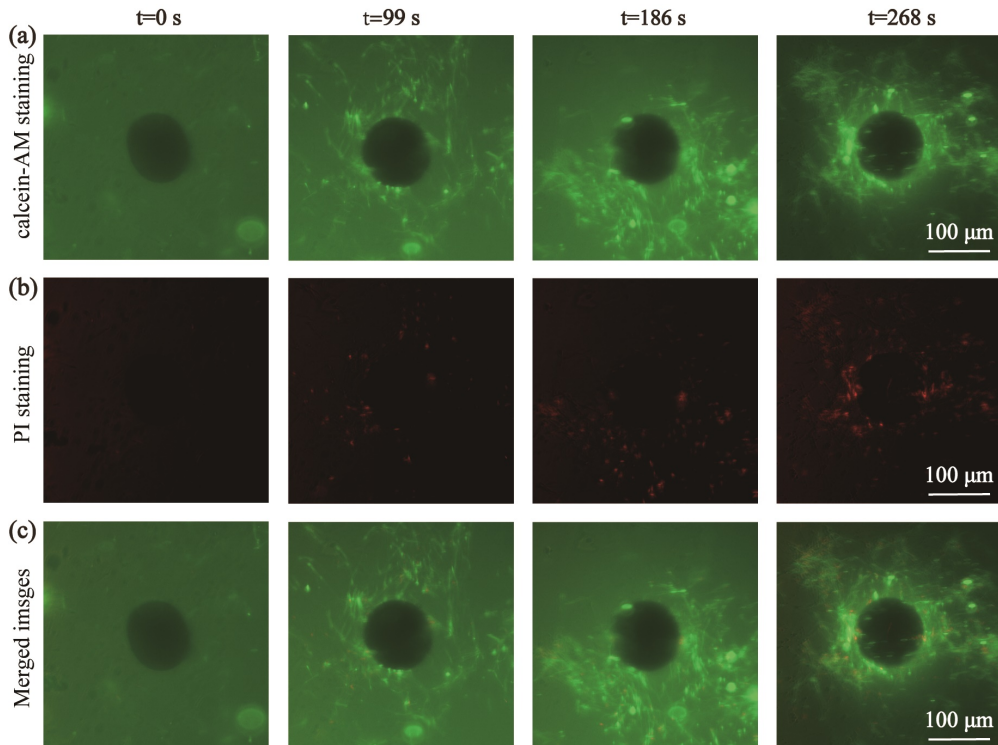

Supplement: d4lc00604f2.pdf [file d4lc00604f2.pdf]

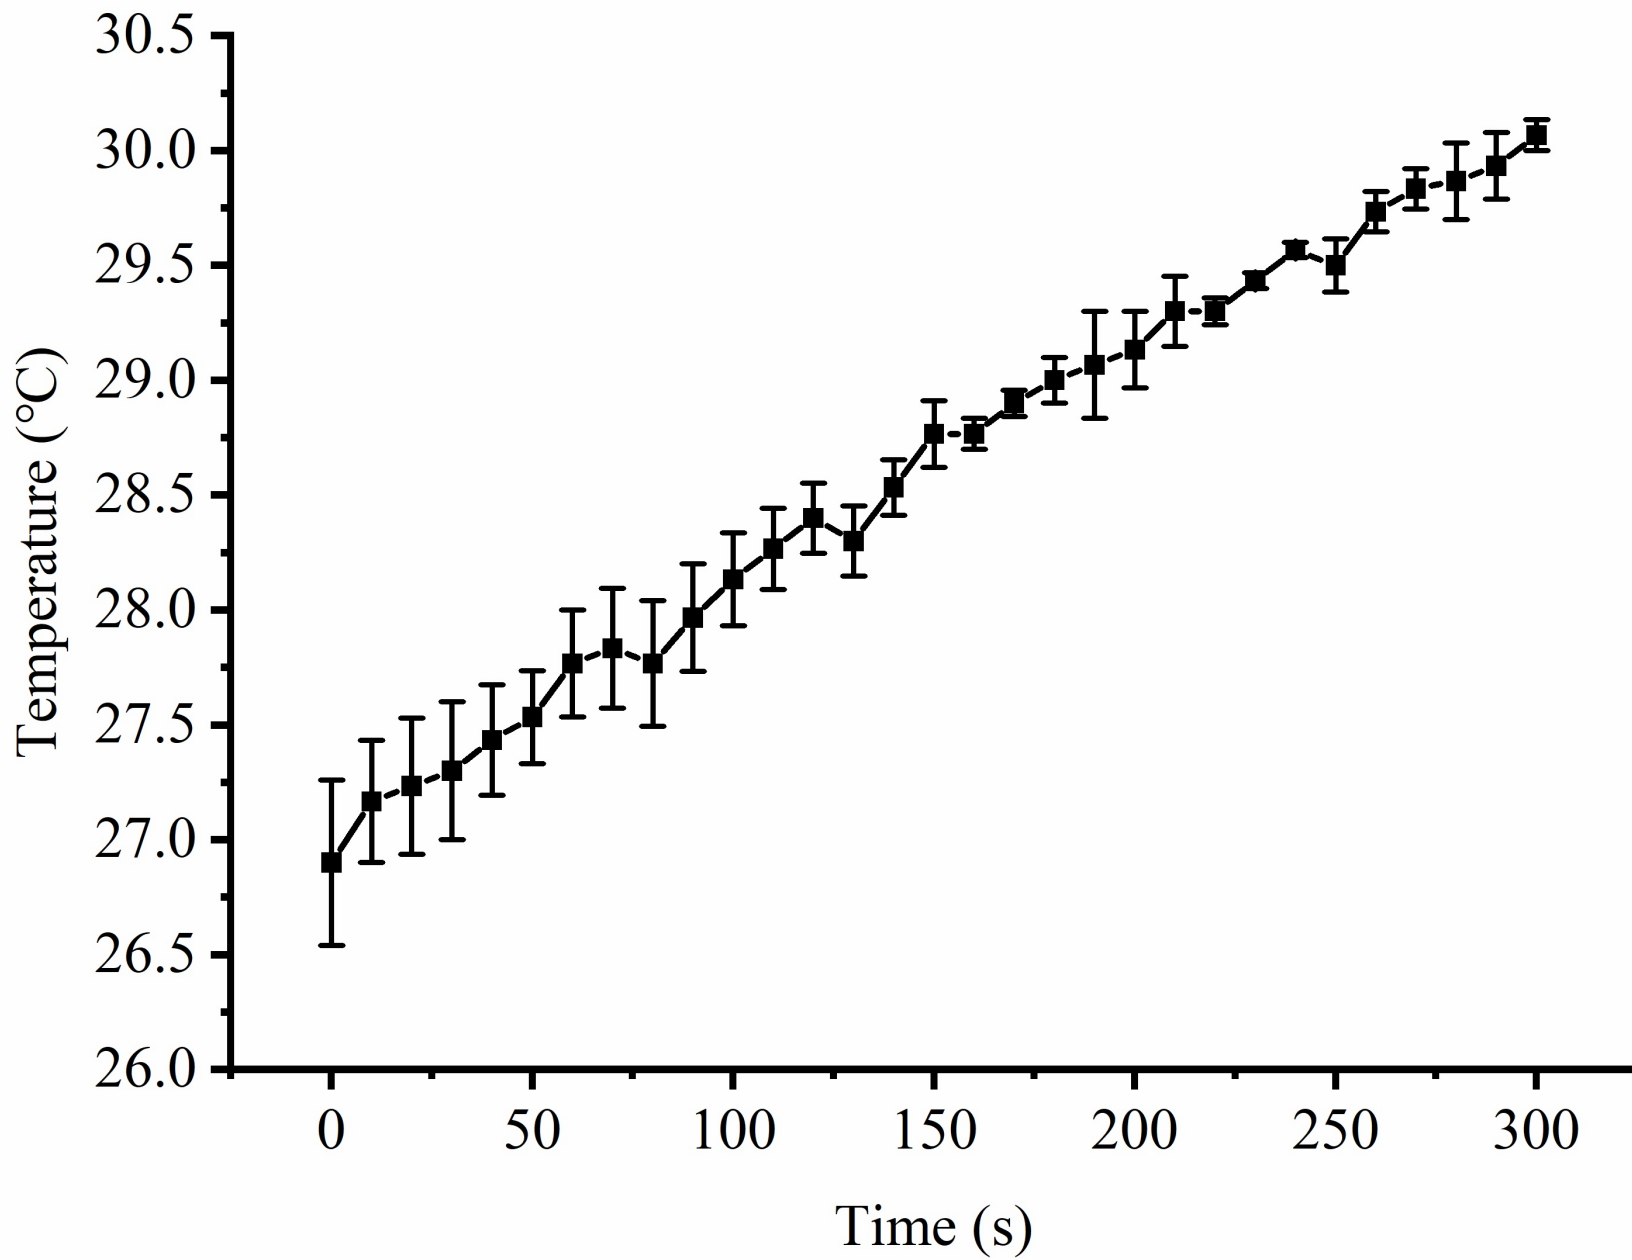

Supplement: d4lc00604f3.pdf [file d4lc00604f3.pdf]

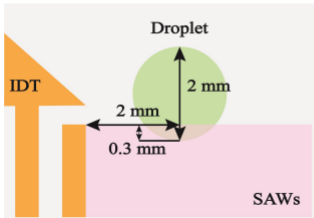

Supplement: d4lc00604f4.pdf [file d4lc00604f4.pdf]
